# Supplementary material for: Insights into protonation for cyclohexanol/water mixtures at the zeolitic Brønsted acid site
Source: Royal Society of Chemistry journal article supplement (doi:10.1039/d0cp06523d), 2021-01-01
Supplement: d0cp06523d1.pdf [file d0cp06523d1.pdf]

## Electronic Supplementary Information

# Insights into Protonation for Cyclohexanol/Water Mixtures at the Zeolitic Brønsted Acid Site

Peng Liu<sup>a</sup>, Zhenxin Yan<sup>a</sup> and Donghai Mei<sup>a, b,\*</sup>

<sup>a</sup>*School of Chemistry and Chemical Engineering, State Key Laboratory of Separation Membranes and Membrane Processes, Tiangong University, Tianjin 300387, China*

<sup>b</sup>*School of Environmental Science and Engineering, Tiangong University, Tianjin 300387, China*

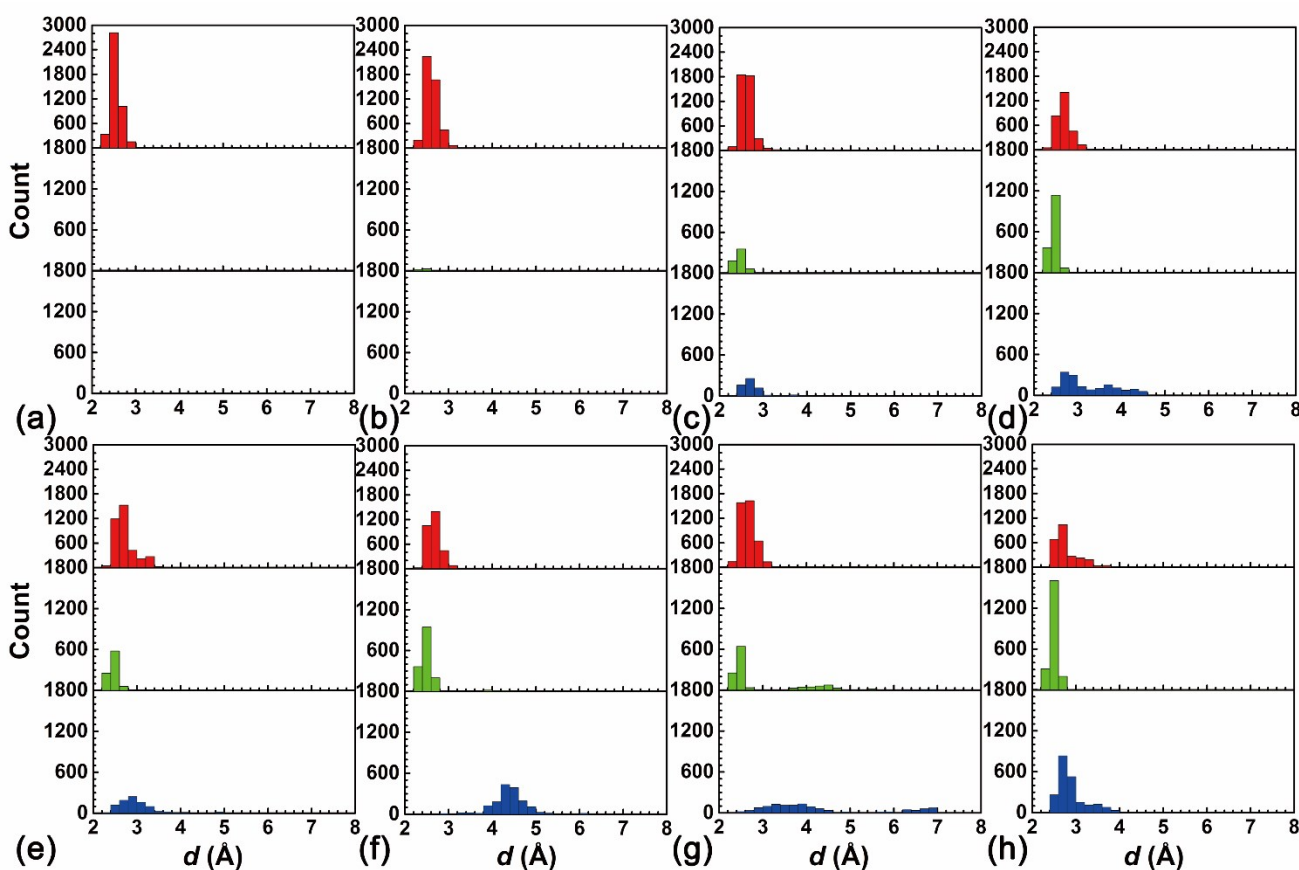

**Fig. S1** Distributions of the minimum  $O_{OH}-O_{Al}$  distance (red) in frames containing the protonated cyclohexanol and the minimum  $O_W-O_{OH}$  distance (green) and minimum  $O_W-O_{Al}$  distance (blue) in frames containing the protonated water. All data was extracted from the 10 ps equilibrium AIMD simulation of (a) H-BEA-CyOH-1W, (b) H-BEA-CyOH-2W, (c) H-BEA-CyOH-3W, (d) H-BEA-CyOH-4W, (e) H-BEA-CyOH-5W, (f) H-BEA-CyOH-6W, (g) H-BEA-CyOH-7W, and (h) H-BEA-CyOH-8W.
